# Supplementary material for: Correlations between complex human phenotypes vary by genetic background, gender, and environment
Source: PubMed Central journal article supplement — Cell Rep Med. 2022 Dec 12;3(12):100844. doi: 10.1016/j.xcrm.2022.100844 (PMC9797952; doi:10.1016/j.xcrm.2022.100844), 2022-12-12
Supplement: mmc1.pdf [file mmc1.pdf]

**Cell Reports Medicine, Volume 3**

## **Supplemental information**

### **Correlations between complex human phenotypes**

#### **vary by genetic background, gender, and environment**

**Michael Elgart, Matthew O. Goodman, Carmen Isasi, Han Chen, Alanna C. Morrison, Paul S. de Vries, Huichun Xu, Ani W. Manichaikul, Xiuqing Guo, Nora Franceschini, Bruce M. Psaty, Stephen S. Rich, Jerome I. Rotter, Donald M. Lloyd-Jones, Myriam Fornage, Adolfo Correa, Nancy L. Heard-Costa, Ramachandran S. Vasan, Ryan Hernandez, Robert C. Kaplan, Susan Redline, The Trans-Omics for Precision Medicine (TOPMed) Consortium, and Tamar Sofer**

# Correlations between complex human phenotypes vary by genetic background, gender, and environment

Elgart et al.

Supplementary Tables.....1

    Table S1 (related to Figures 2,3). Phenotypes harmonized across participating studies by the TOPMed DCC used in this study .....4

    Table S3 (related to Figure 4). Code and descriptions of HCHS/SOL phenotypes used in this study .....6

Supplementary Figures .....7

    Figure S1 (related to Figures 2-4). Populations backgrounds as captured by PCA analysis .....7

    Figure S2 (related to Figure 1). Comparison of simulations compare HEc, the ground truth and GCTA-GREML .8

    Figure S3 (related to Figure 1). Comparison of confidence interval coverages in simulations of HEc and GCTA-GREML approach .....9

    Figure S4 (related to Figure 1). Comparison HEc and GCTA-GREML applied on different populations in simulations .....10

    Figure S5 (related to Figure 1). Comparison of results of HEc, GCTA-GREML and two LD-score based methods for computation of phenotype heritabilities and genetic correlations from the TOPMed dataset stratified by populations .....11

    Figure S6 (related to Figure 1). Sensitivity analysis studying the effect of presence of relatives in the data on heritability and genetic correlation estimates .....12

    Figure S7 (related to Figure 3). Certain genetic correlations are background-specific. ....13

    Figure S8 (related to Figure 4). Genetic and environmental correlations and heritabilities of 61 phenotypes in self-reported Hispanics/Latinos.....14

    Figure S9 (related to Figure 5). Genetic and environmental correlations and heritabilities differ by gender in Hispanics/Latinos. ....15

    Figure S10 (related to Figure 5). Genetic correlations in individuals of White background stratified by gender. ..16

References.....17

## Supplementary Tables

| Code                     |                             | Description                                                                                                                                                    |
|--------------------------|-----------------------------|----------------------------------------------------------------------------------------------------------------------------------------------------------------|
| annotated_sex_1          |                             | Biological sex                                                                                                                                                 |
| Race/ethnicity           | <i>hispanic_or_latino_1</i> | Indicator of reported Hispanic or Latino ethnicity; only used samples where this agreed with “race_us_1”                                                       |
|                          | <i>race_us_1</i>            | Reported race of participant according to the United States administrative definition of race; only used samples where this agreed with “hispanic_or_latino_1” |
| age_at_height_baseline_1 |                             | Age                                                                                                                                                            |
| height_baseline_1        |                             | Body height                                                                                                                                                    |

|                             |                                                                                                                                                                             |
|-----------------------------|-----------------------------------------------------------------------------------------------------------------------------------------------------------------------------|
| bmi_baseline_1              | Body mass index                                                                                                                                                             |
| antihypertensive_meds_1     | Indicator for use of antihypertensive medication at the time of blood pressure measurement                                                                                  |
| bp_systolic_1               | Resting systolic blood pressure from the upper arm in a clinical setting; only used samples if blood pressure lowering medications were not used (antihypertensive_meds_1)  |
| bp_diastolic_1              | Resting diastolic blood pressure from the upper arm in a clinical setting; only used samples if blood pressure lowering medications were not used (antihypertensive_meds_1) |
| lipid_lowering_medication_1 | Indicates whether participant was taking any lipid-lowering medication at blood draw to measure lipids phenotypes                                                           |
| total_cholesterol_1         | Blood mass concentration of total cholesterol; only used samples where no lipid medication was used (lipid_lowering_medication_1)                                           |
| triglycerides_1             | Blood mass concentration of triglycerides; only used samples where no lipid medication was used (lipid_lowering_medication_1)                                               |
| hdl_1                       | Blood mass concentration of high-density lipoprotein cholesterol; only used samples where no lipid medication was used (lipid_lowering_medication_1)                        |
| ldl_1                       | Blood mass concentration of low-density lipoprotein cholesterol; only used samples where no lipid medication was used (lipid_lowering_medication_1)                         |
| hemoglobin_mcnc_bld_1       | Measurement of mass per volume, or mass concentration (mcnc), of hemoglobin in the blood (bld)                                                                              |
| hematocrit_vfr_bld_1        | Measurement of hematocrit, the fraction of volume (vfr) of blood (bld) that is composed of red blood cells                                                                  |
| rbc_ncnc_bld_1              | Count by volume, or number concentration (ncnc), of red blood cells in the blood (bld)                                                                                      |
| wbc_ncnc_bld_1              | Count by volume, or number concentration (ncnc), of white blood cells in the blood (bld)                                                                                    |
| basophil_ncnc_bld_1         | Count by volume, or number concentration (ncnc), of basophils in the blood (bld)                                                                                            |
| eosinophil_ncnc_bld_1       | Count by volume, or number concentration (ncnc), of eosinophils in the blood (bld)                                                                                          |
| neutrophil_ncnc_bld_1       | Count by volume, or number concentration (ncnc), of neutrophils in the blood (bld)                                                                                          |
| lymphocyte_ncnc_bld_1       | Count by volume, or number concentration (ncnc), of lymphocytes in the                                                                                                      |

|                           |                                                                                                                                                                                      |
|---------------------------|--------------------------------------------------------------------------------------------------------------------------------------------------------------------------------------|
|                           | blood (bld)                                                                                                                                                                          |
| monocyte_ncnc_bld_1       | Count by volume, or number concentration (ncnc), of monocytes in the blood (bld)                                                                                                     |
| platelet_ncnc_bld_1       | Count by volume, or number concentration (ncnc), of platelets in the blood (bld)                                                                                                     |
| mch_entmass_rbc_1         | Measurement of the average mass (entmass) of hemoglobin per red blood cell(rbc), known as mean corpuscular hemoglobin (MCH)                                                          |
| mchc_mcnc_rbc_1           | Measurement of the mass concentration (mcnc) of hemoglobin in a given volume of packed red blood cells (rbc), known as mean corpuscular hemoglobin concentration (MCHC)              |
| mcv_entvol_rbc_1          | Measurement of the average volume (entvol) of red blood cells (rbc), known as mean corpuscular volume (MCV)                                                                          |
| pmv_entvol_bld_1          | Measurement of the mean volume (entvol) of platelets in the blood (bld), known as mean platelet volume (MPV or PMV)                                                                  |
| rdw_ratio_rbc_1           | Measurement of the ratio of variation in width to the mean width of the red blood cell (rbc) volume distribution curve taken at +/- 1 CV, known as red cell distribution width (RDW) |
| cd40_1                    | Cluster of differentiation 40 ligand (CD40) concentration in blood.                                                                                                                  |
| crp_1                     | C-reactive protein (CRP) concentration in blood                                                                                                                                      |
| eselectin_1               | E-selectin concentration in blood.                                                                                                                                                   |
| icam1_1                   | Intercellular adhesion molecule 1 (ICAM1) concentration in blood                                                                                                                     |
| il1_beta_1                | Interleukin 1 beta (IL1b) concentration in blood                                                                                                                                     |
| il6_1                     | Interleukin 6 (IL6) concentration in blood                                                                                                                                           |
| il10_1                    | Interleukin 10 (IL10) concentration in blood                                                                                                                                         |
| il18_1                    | Interleukin 18 (IL18) concentration in blood                                                                                                                                         |
| isoprostane_8_epi_pgf2a_1 | Isoprostane 8-epi-prostaglandin F2 alpha (8-epi-PGF2a) concentration in urine                                                                                                        |
| lppla2_act_1              | Activity of lipoprotein-associated phospholipase A2 (LP-PLA2), also known as platelet-activating factor acetylhydrolase, measured in blood                                           |
| lppla2_mass_1             | Mass of lipoprotein-associated phospholipase A2 (LP-PLA2), also known as platelet-activating factor acetylhydrolase, measured in blood                                               |

|             |                                                                                                               |
|-------------|---------------------------------------------------------------------------------------------------------------|
| mcp1_1      | Monocyte chemoattractant protein-1 (MCP1), also known as C-C motif chemokine ligand 2, concentration in blood |
| mmp9_1      | Matrix metalloproteinase 9 (MMP9) concentration in blood                                                      |
| mpo_1       | Myeloperoxidase (MPO) concentration in blood                                                                  |
| opg_1       | Osteoprotegerin (OPG) concentration in blood                                                                  |
| pselectin_1 | P-selectin concentration in blood.                                                                            |
| tnfa_1      | Tumor necrosis factor alpha (TNFa) concentration in blood                                                     |
| tnfa_r1_1   | Tumor necrosis factor alpha receptor 1 (TNFa-R1) concentration in blood                                       |
| tnfr2_1     | Tumor necrosis factor receptor 2 (TNFR2) concentration in blood                                               |

Table S1 (related to Figures 2,3). Phenotypes harmonized across participating studies by the TOPMed DCC used in this study

| Code          | Description                                                            |
|---------------|------------------------------------------------------------------------|
| AHI           | Apnea/Hypopnea Events (3% desat)                                       |
| MinSpO2       | Minimum oxyhemoglobin saturation during sleep                          |
| AvgSpO2       | Mean oxygen saturation during sleep                                    |
| SpO290        | Percent sleep time with oxygen saturation less than 90%                |
| Height        | Height                                                                 |
| BMI           | Body Mass Index (kg/m <sup>2</sup> )                                   |
| WaistHip      | Waist to Hip Ratio                                                     |
| FEV1FVC       | FEV1 to FVC Ratio (%)                                                  |
| FEV1          | Forced Expiratory Volume                                               |
| FEVC          | Forced Vital Capacity                                                  |
| PhysHlth      | Aggregate Physical Health Scale                                        |
| BrchIdx       | Overall Ankle Brachial Index (occ. failure incl.)                      |
| FastInsl      | Insulin, fasting (converted to mU/L)                                   |
| OGTTInsl      | Insulin, post OGTT (converted to mU/L)                                 |
| eGFRnodemo    | eGFR based on serum cystatin C w/o demographics                        |
| eGFRwdemo     | eGFR based on serum cystatin C, serum creatinine, gender, age and race |
| HOMA          | HOMA-IR index of Insulin Resistance                                    |
| BCell         | HOMA-BCELL index of Insulin Resistance                                 |
| GlycHemo      | Glycosylated Hemoglobin in SI units (mmol/mol)                         |
| ECGAbnorm_Mj  | Major ECG Abnormalities                                                |
| ECGAbnorm_Min | Minor ECG Abnormalities                                                |
| EpSleep       | Epworth Sleepiness Scale                                               |

|                 |                                                                         |
|-----------------|-------------------------------------------------------------------------|
| SleepDur        | Self-reported sleep duration (difference in bed and wake times) (hours) |
| Insom           | Women's Health Initiative Insomnia Rating Scale                         |
| SysBP           | Systolic Blood Pressure                                                 |
| DiasBP          | Diastolic Blood Pressure                                                |
| Arter           | Mean arterial pressure                                                  |
| Pulse           | Pulse pressure                                                          |
| WBC             | White Blood Count (x10e9)                                               |
| RBC             | Red Blood Count (x10e12)                                                |
| Hemoglob        | Hemoglobin (g/dL)                                                       |
| Hemocrit        | % Hematocrit                                                            |
| CorpVol         | Mean Corpuscular Volume (fl)                                            |
| MnCorpHemo      | Mean Corpuscular Hemoglobin (pg)                                        |
| MnCorpHemoConc  | Mean Corpuscular Hemoglobin Concentration (g/dL)                        |
| RedCellDistWdth | % Red Cell Distribution Width                                           |
| PlateletCnt     | Platelet Count (x10e9)                                                  |
| NeutCnt         | Neutrophil Count (x10e9)                                                |
| LymphCnt        | Lymphocyte Count (x10e9)                                                |
| MonoCnt         | Monocyte Count (x10e9)                                                  |
| EosCnt          | Eosinophil Count (x10e9)                                                |
| BasoCnt         | Basophil Count (x10e9)                                                  |
| Chol            | Total cholesterol (mg/dL)                                               |
| Triglyc         | Triglycerides (mg/dL)                                                   |
| HDLChol         | HDL-cholesterol (mg/dL)                                                 |
| LDLChol         | LDL-cholesterol (mg/dL)                                                 |
| FastGluc        | Glucose, fasting (mg/dL)                                                |
| OGTTGluc        | Glucose, post OGTT (mg/dL)                                              |
| GlycoHemo       | % Glycosylated Hemoglobin                                               |
| Creat           | Creatinine (mg/dL)                                                      |
| UrineCreat      | Urine creatinine, random (mg/dL)                                        |
| UrineMicroAlb   | Urine microalbumin, random (mg/dL)                                      |
| AlbCreat        | Albumin/creatinine ratio (mg/g)                                         |
| Fe              | Iron (ug/dL)                                                            |
| FeBindCap       | Total Iron Binding Capacity (TIBC) (ug/dL)                              |
| TransSat        | % Transferrin saturation                                                |
| CReactProt      | High-sensitivity C-Reactive Protein (mg/L)                              |
| HrtRt           | Heart Rate                                                              |
| PRDur           | PR duration                                                             |
| QRSDur          | QRS duration                                                            |
| QTDur           | QT duration                                                             |
| Sex             | Sex                                                                     |

Table S3 (related to Figure 4). Code and descriptions of HCHS/SOL phenotypes used in this study

| <i>Code</i> | <i>Phenotype</i>         | <i>N</i> | <i>Females</i> | <i>Males</i> | <i>AFR</i> | <i>AMR</i> | <i>CSA</i> | <i>EAS</i> | <i>EUR</i> | <i>MID</i> |
|-------------|--------------------------|----------|----------------|--------------|------------|------------|------------|------------|------------|------------|
| 30690       | Cholesterol              | 420607   | 227266         | 193341       | 6212       | 938        | 8422       | 2572       | 400963     | 1500       |
| 30760       | HDL cholesterol          | 385023   | 206578         | 178445       | 5754       | 854        | 7688       | 2342       | 367021     | 1364       |
| 30780       | LDL direct               | 419831   | 226901         | 192930       | 6200       | 938        | 8404       | 2568       | 400223     | 1498       |
| 30870       | Triglycerides            | 420271   | 227138         | 193133       | 6211       | 937        | 8415       | 2570       | 400639     | 1499       |
| 1160        | Sleep duration           | 429528   | 232661         | 196854       | 6382       | 959        | NA         | 2631       | 418009     | 1547       |
| 21001       | Body mass index (BMI)    | 439590   | 237771         | 201805       | 6545       | 971        | 8646       | 2693       | 419163     | 1572       |
| 50          | Standing height          | 438478   | 237363         | 201115       | 6556       | 972        | 8657       | 2697       | 419596     | NA         |
| 4079        | Diastolic blood pressure | 416959   | 225161         | 191786       | 6551       | 959        | 8641       | 2600       | 396667     | 1541       |
| 4080        | Systolic blood pressure  | 416955   | 225159         | 191784       | 6551       | 959        | 8641       | 2600       | 396663     | 1541       |

Table S5 (related to Figure 1). Pan-UKBB summary statistics for phenotypes used in LDSC estimations of heritability and genetic correlations. Description of all the GWAS used in this work. All data were downloaded from the Pan-UKBB website (<https://pan.ukbb.broadinstitute.org/>). Phenotype names along with internal codes are provided for reproducibility. Each phenotype is further broken down by ancestry groups (AFR – African ancestry, AMR – Admixed American ancestry, CSA - Central/South Asian ancestry, EAS - East Asian ancestry, EUR – European ancestry, MID - Middle Eastern ancestry)

Supplementary Figures

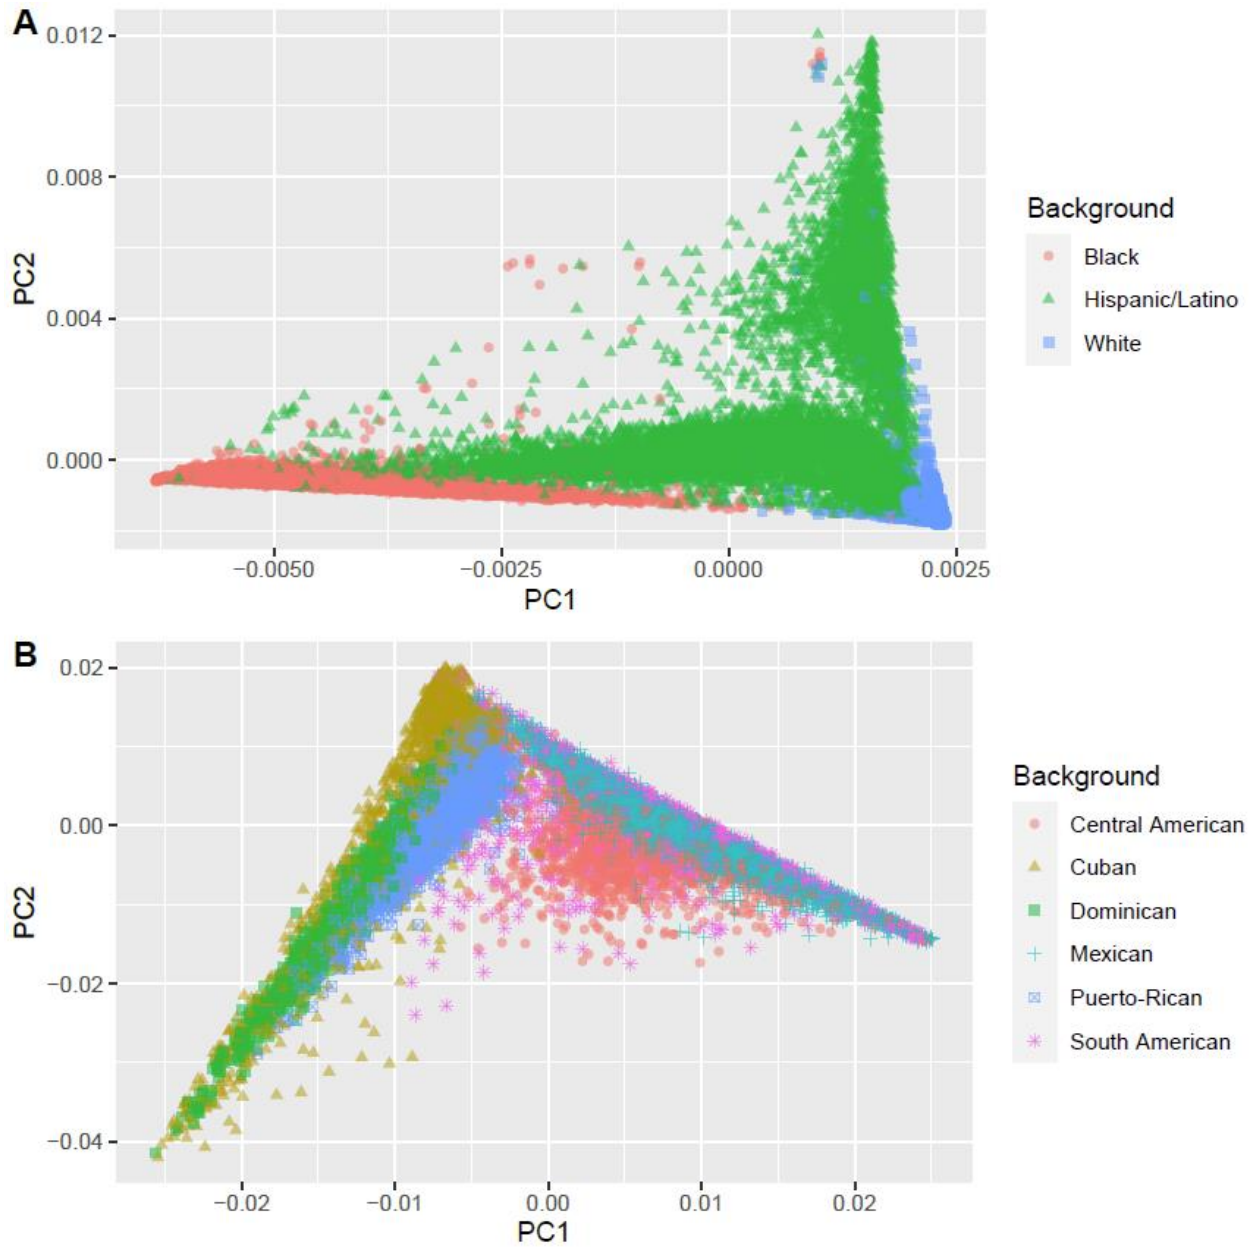

Figure S1 (related to Figures 2-4). Populations backgrounds as captured by PCA analysis  
Shown here are PCA plots for first and second principal components for the two datasets used in this study. The TOPMed dataset (A) and the HCHS/SOL dataset (B).



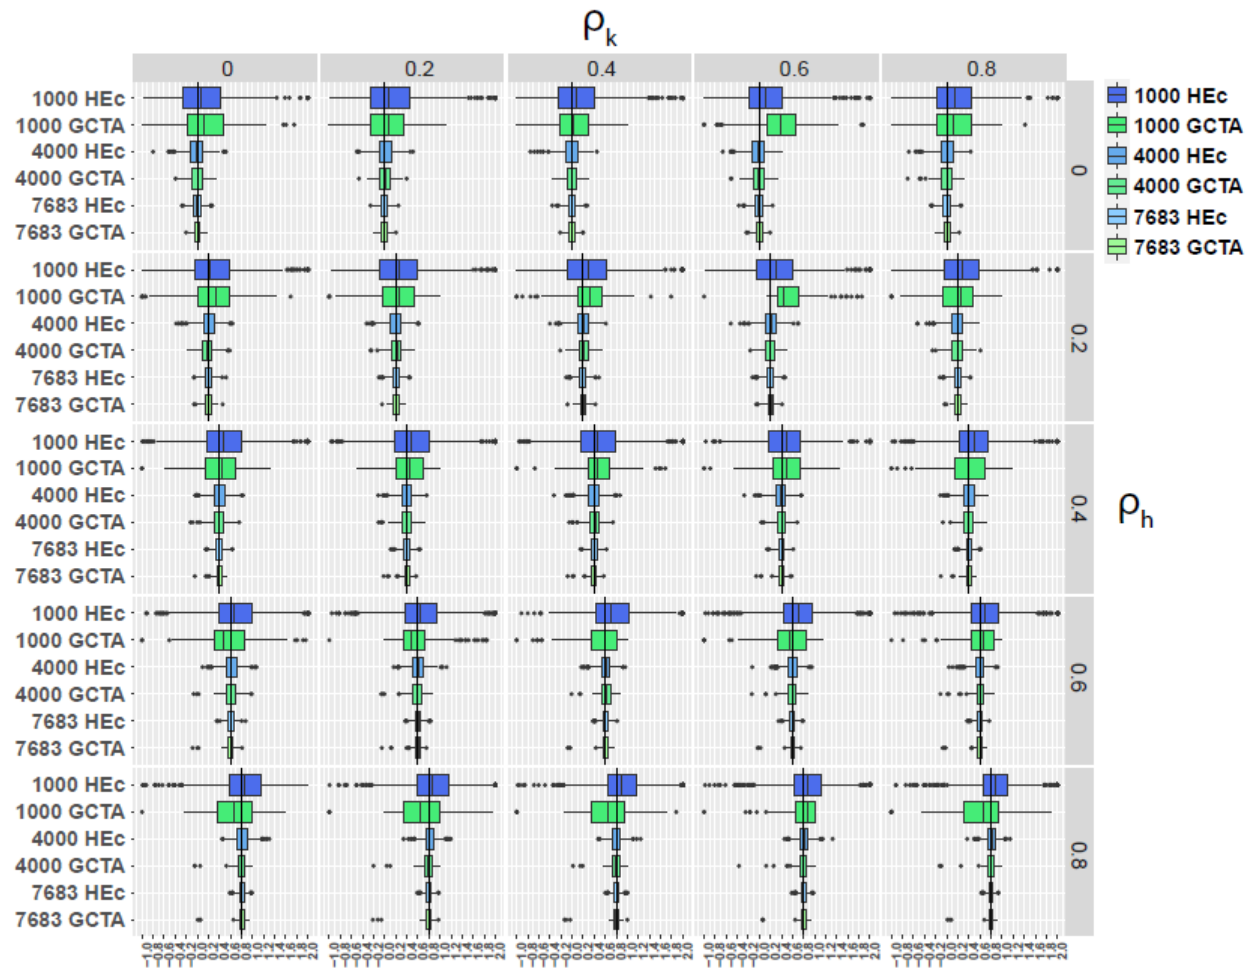

Figure S2 (related to Figure 1). Comparison of simulations compare HEC, the ground truth and GCTA-GREML. Two relatedness matrices were used to simulate phenotypes with known correlation coefficients ( $\rho_h, \rho_k$ ). Each phenotype was simulated 1000 times in 1000, 4000 and 7683 people. Shown here are the boxplots of distributions of estimated  $\rho_k$  for both our closed-form HE approach (HEC, blue colors) as well as the gold-standard REML method GCTA (green colors) [12].

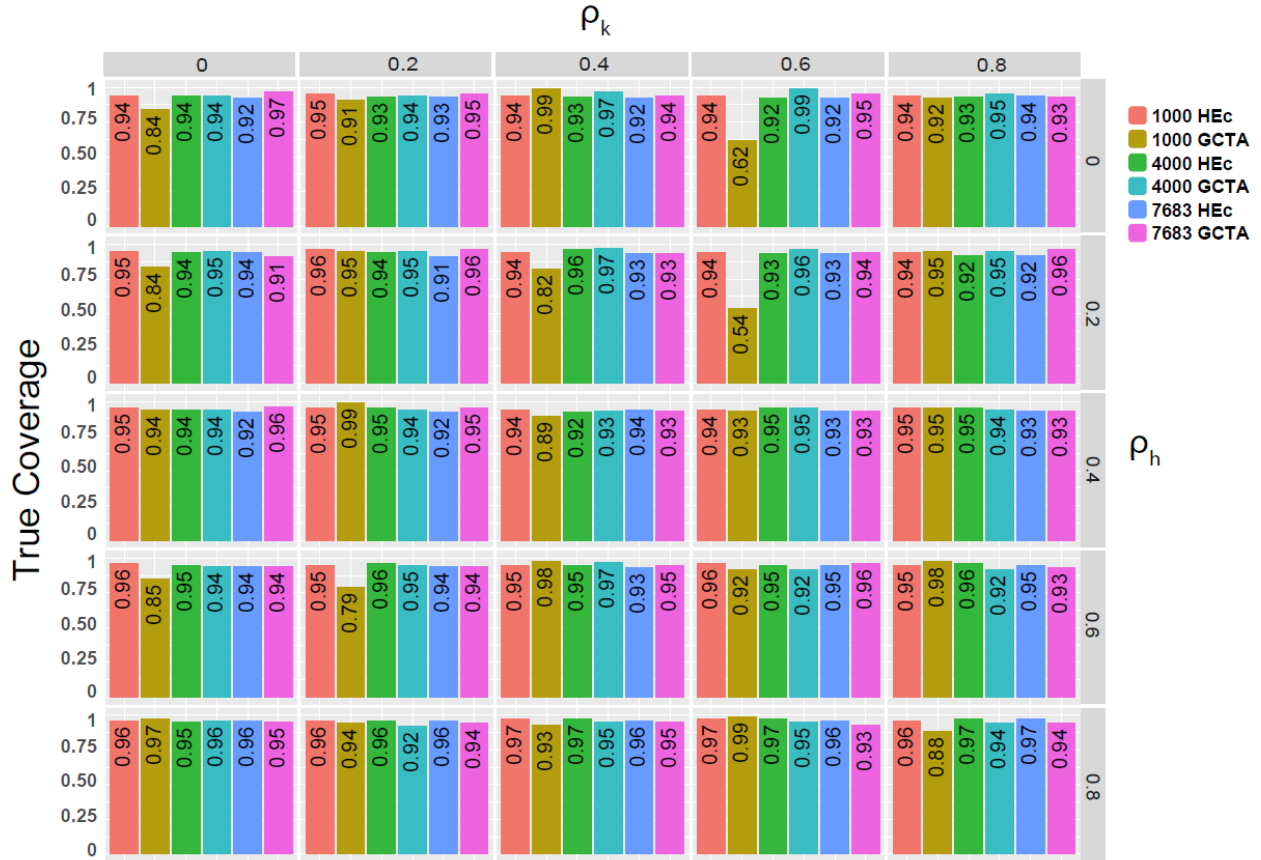

Figure S3 (related to Figure 1). Comparison of confidence interval coverages in simulations of HEC and GCTA-GREML approach

Two relatedness matrices were used to simulate phenotypes with known correlation coefficients ( $\rho_h, \rho_k$ ). Each phenotype was simulated 1000 times in 1000, 4000 and 7683 people. Next 95% Confidence Intervals were calculated via HEC using the quantile method, as well as GCTA [12]. For each such combination we display the true coverage (i.e. the fraction of the simulated cases where true value of  $\rho_k$  was within the reported confidence interval).

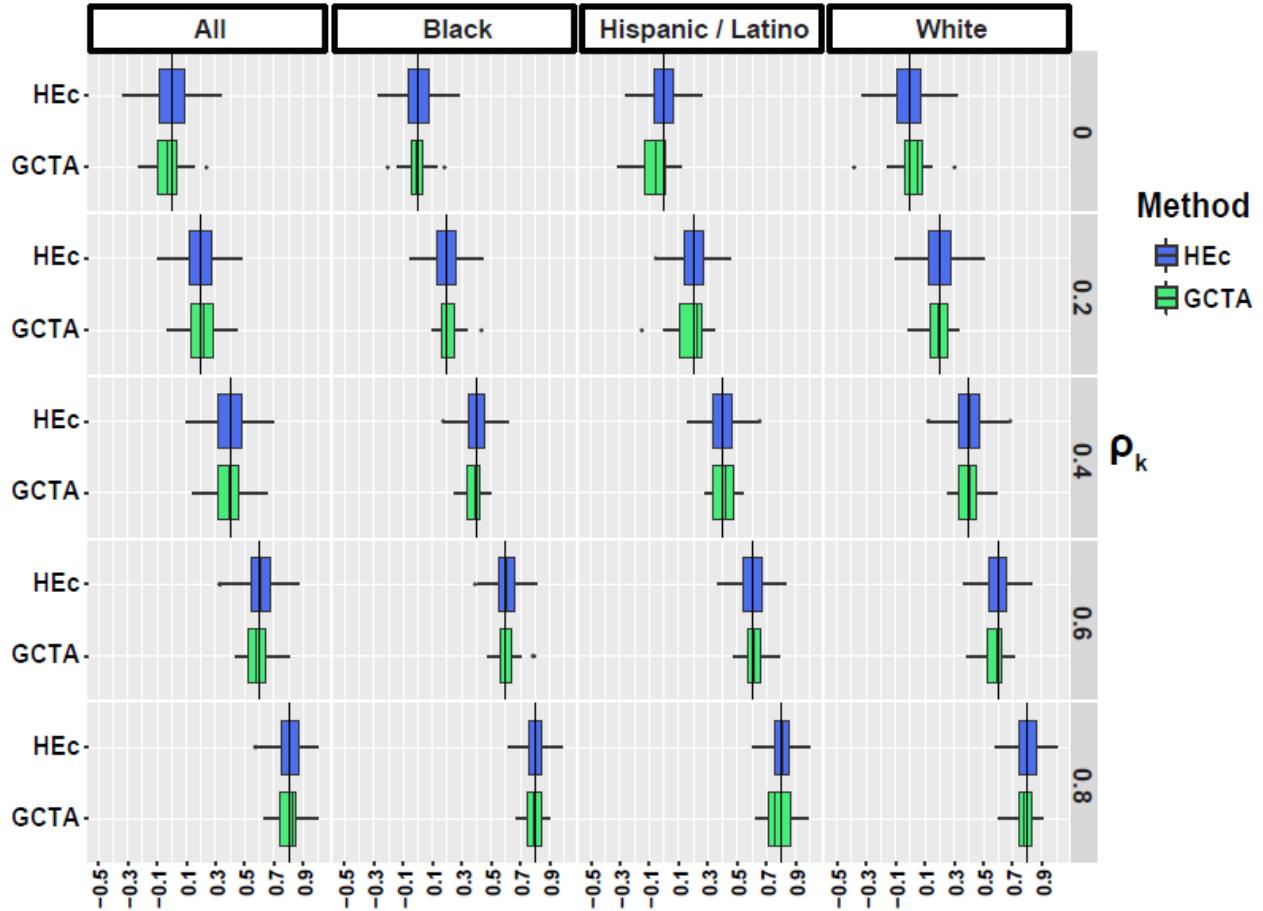

Figure S4 (related to Figure 1). Comparison HEC and GCTA-GREML applied on different populations in simulations

Relatedness data from three TOPMed populations (as well as a joint population consisting of equal number of all three) were used to simulate phenotypes pairs with known genetic correlation coefficients ( $\rho_k$ ). Each phenotype was simulated 1000 times for 7706 people. Shown here are the boxplots of distributions of estimated  $\rho_k$  for HEC (blue colors) as well as GCTA-GREML.

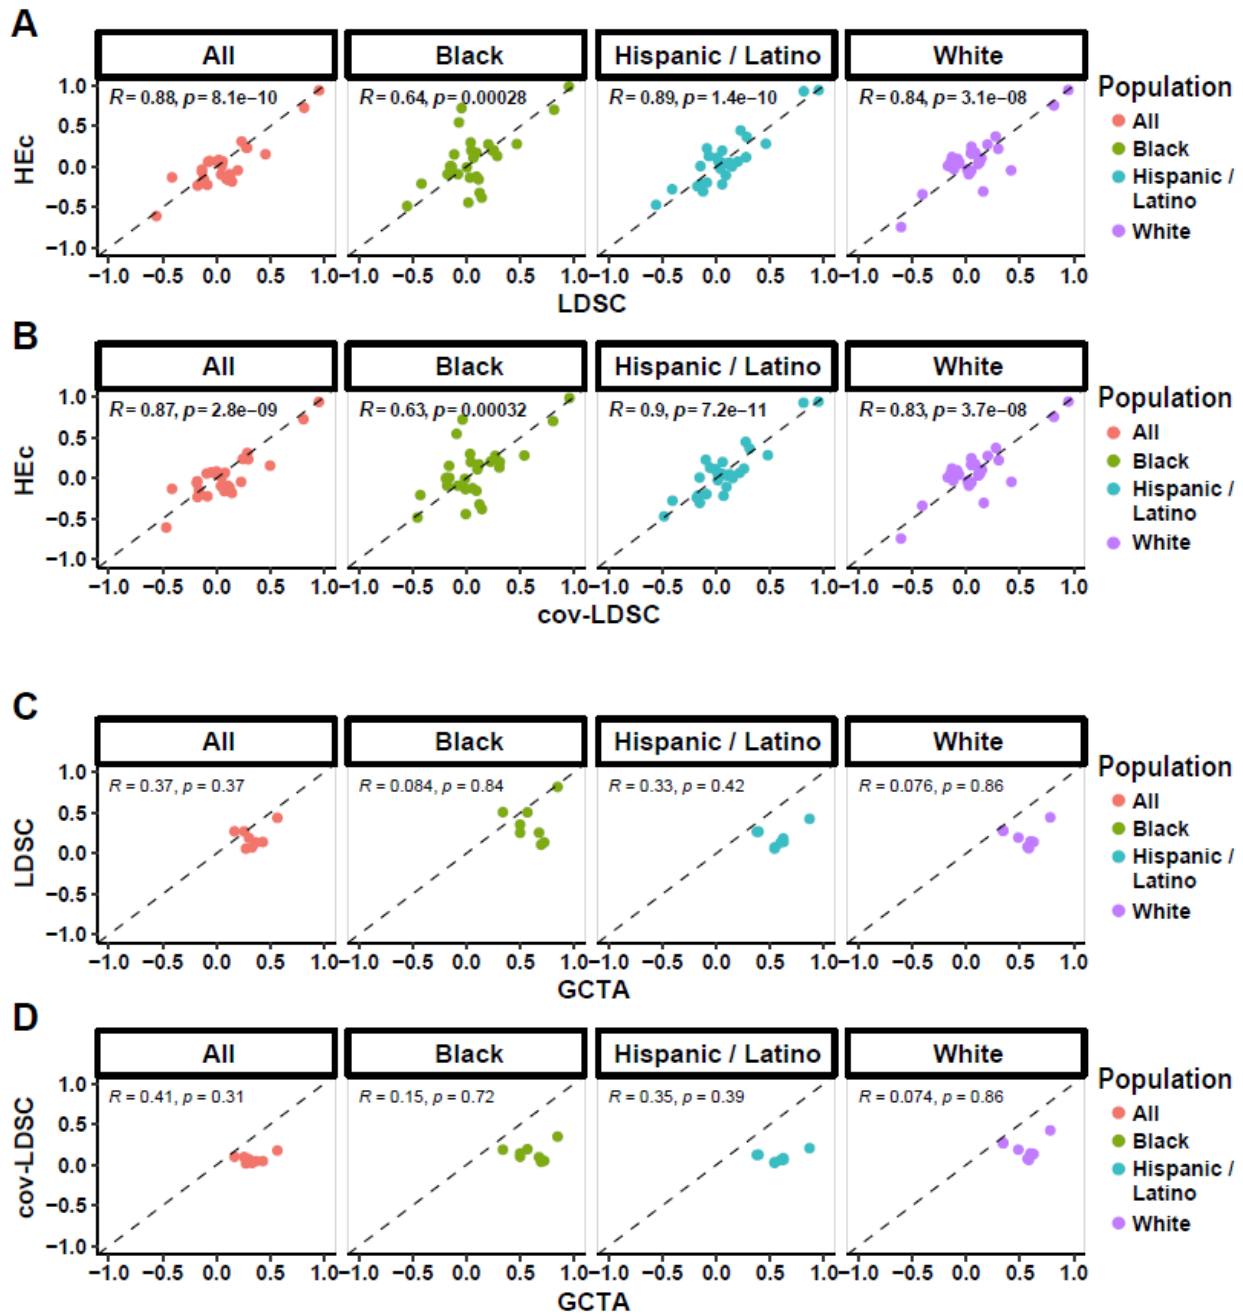

Figure S5 (related to Figure 1). Comparison of results of HEC, GCTA-GREML and two LD-score based methods for computation of phenotype heritabilities and genetic correlations from the TOPMed dataset stratified by populations. Comparison of results between our HEC method, GREML and two LD-score based methods for computation of genetic correlations and genetic heritabilities in the TOPMed dataset either joint or stratified by populations (A) Comparison of  $\rho_k$  (genetic correlation coefficient) estimations between HEC and LDSC for 112 pairs of 8 phenotypes selected from the diverse TOPMed cohort (B) Comparison of  $\rho_k$  estimations for same cohorts between HE and cov-LDSC which is a novel methods which may improve LDSC performance in mismatched populations (see Materials and Methods for description of the GWASes used) (C) Comparison of heritability estimates between GCTA and LDSC for the 8 phenotypes either in joint dataset or stratified by self-reported ancestry. (D) same as (C) but using cov-LDSC.

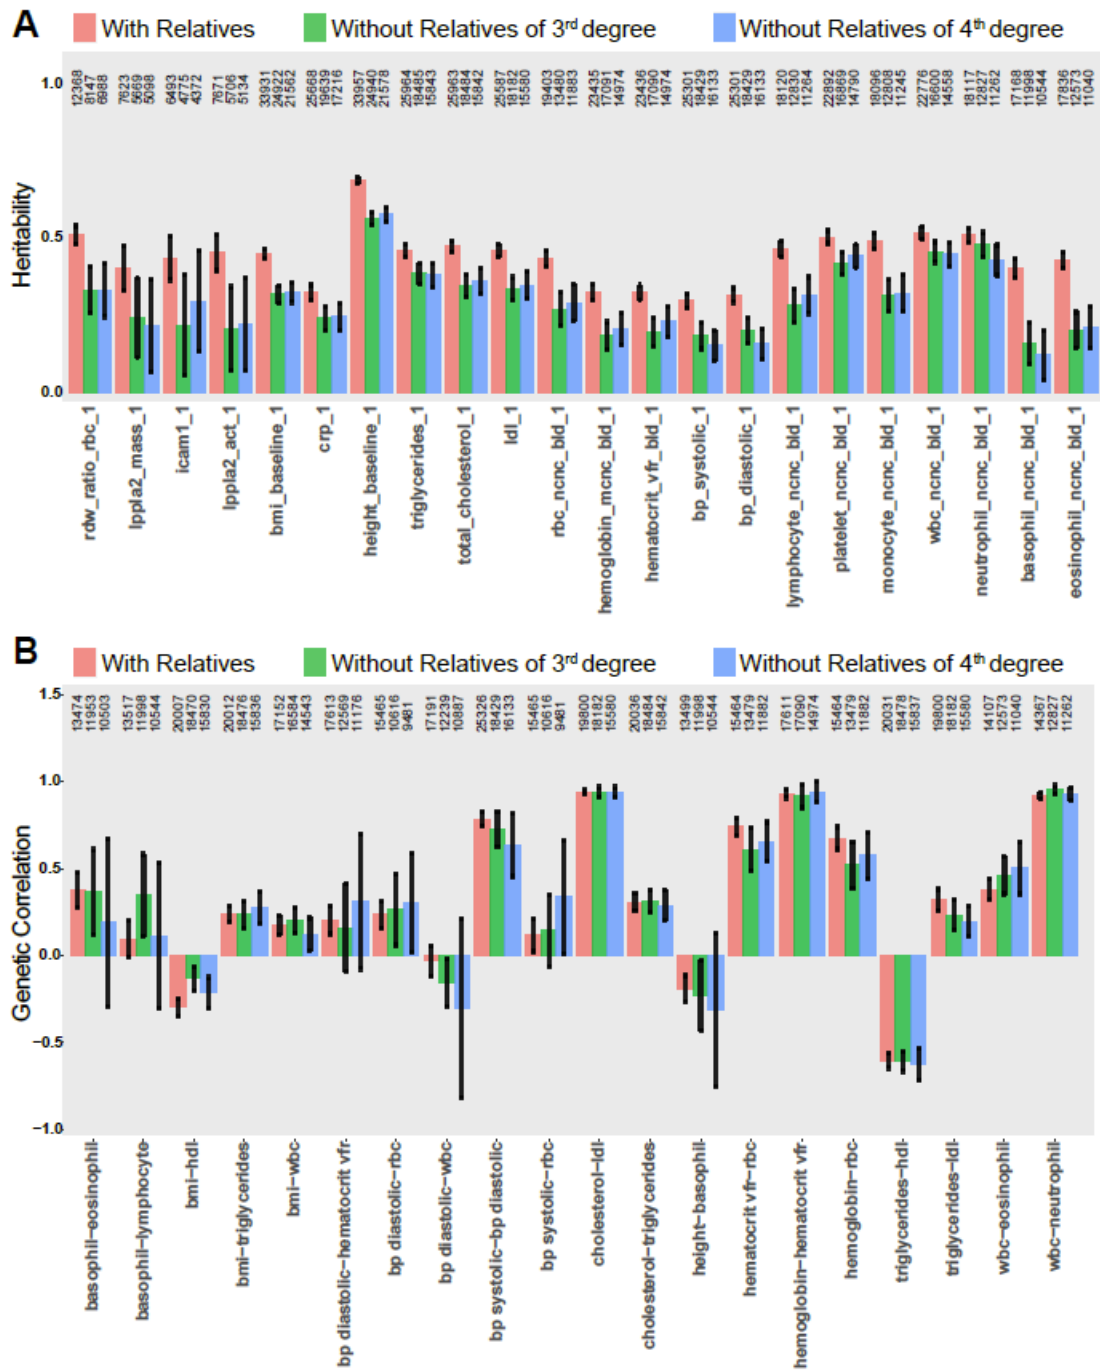

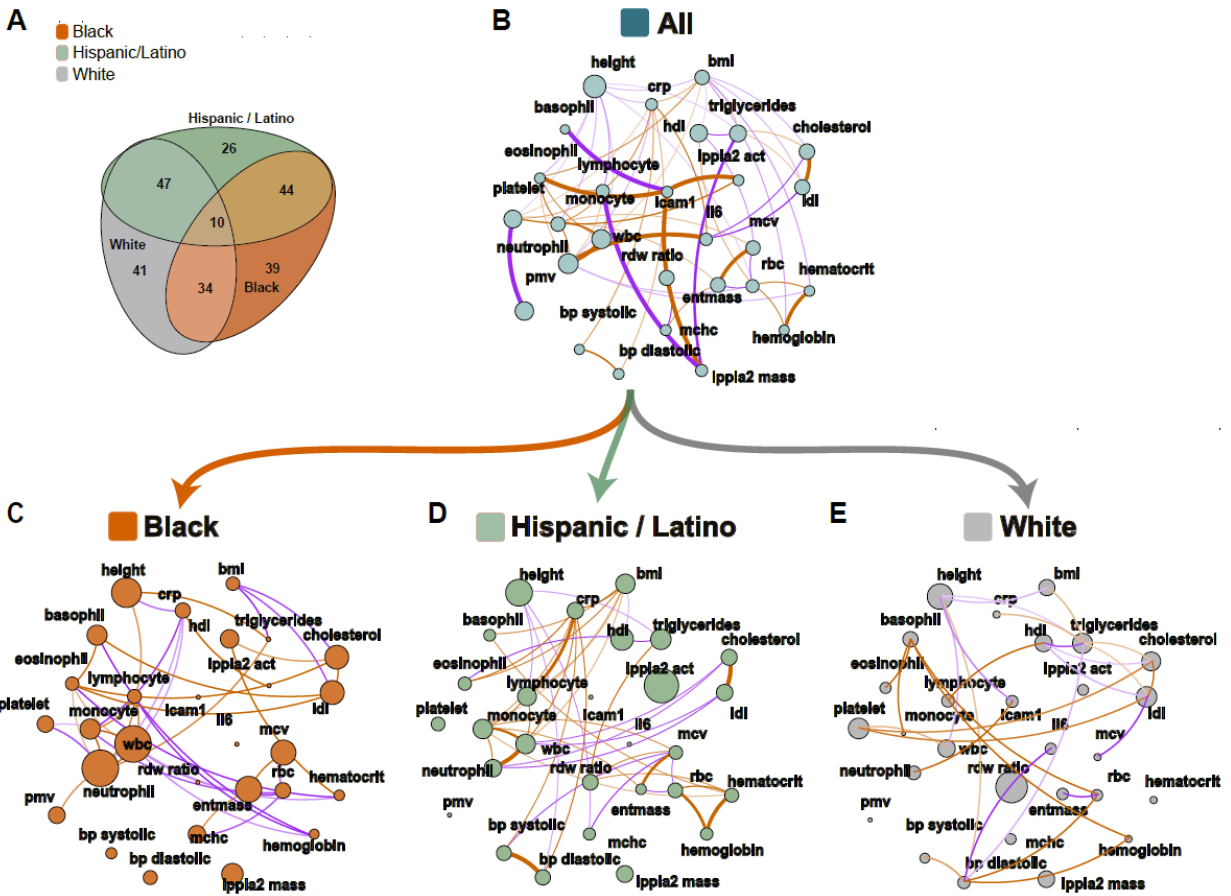

Figure S7 (related to Figure 3). Certain genetic correlations are background-specific.

(B-E) Correlation plots where each phenotype is represented by a node and the correlations are represented by connections (edges) between nodes. The size of the node is proportional to the phenotype heritability. The thickness of the edge is proportional to the strength of correlation and the color represents magnitude: orange represents positive and purple negative correlation. (B) Genetic correlations ( $\rho_k$ ) between the 28 phenotypes in the combined TOPMed dataset (p-value < 0.05) (C, D, E) Genetic correlations ( $\rho_k$ ) between the 28 phenotypes in the background-specific subsets of the TOPMed dataset - Black (C, orange), Hispanic/Latino (D, marine) and White (E, grey). (A) Venn diagram depicting the overlap in significant phenotype-pairs between Black (orange), Hispanic/Latino (marine) and White (grey) for genetic correlation.



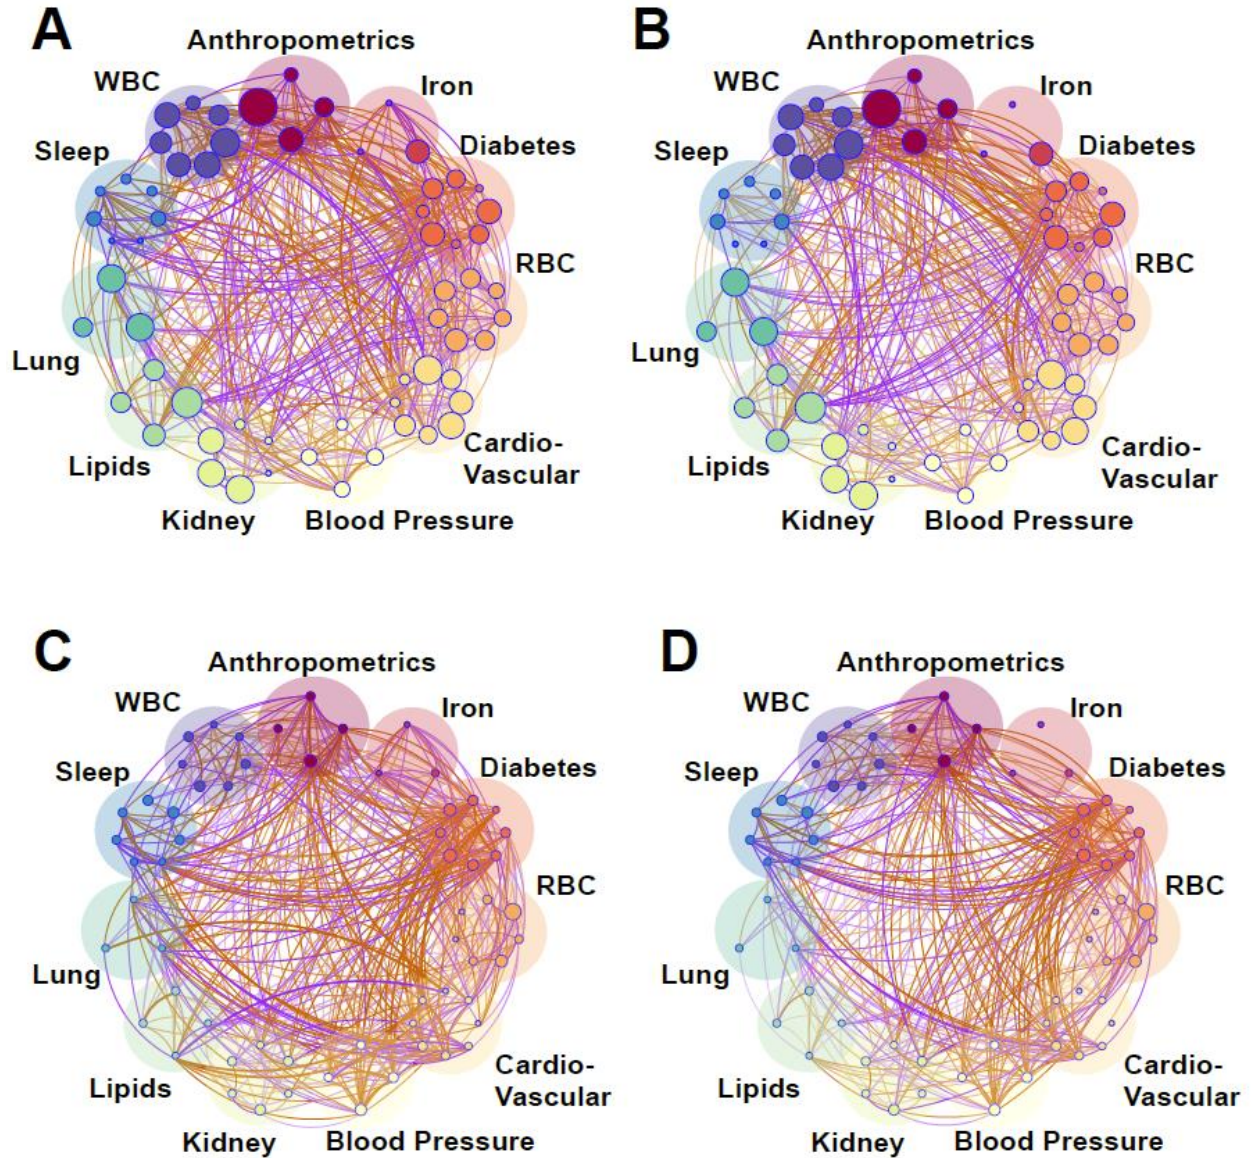

Figure S8 (related to Figure 4). Genetic and environmental correlations and heritabilities of 61 phenotypes in self-reported Hispanics/Latinos.

Correlation plots between the 61 phenotypes in the TOPMed HCHS/SOL dataset. Each phenotype is represented by a node (colored small circles) with the size of the circle proportional to the phenotype heritability. The correlations are represented by connections (edges) between nodes (phenotypes). The nodes are grouped into phenotypic domains (colored semi-transparent circles labelled Anthropometrics, Iron, etc.). The thickness of the edge is proportional to the strength of correlation and the color represents magnitude: orange represents positive and purple negative correlation. (A) Genetic correlations ( $\rho_k$ ) between the 61 phenotypes (p-value < 0.05) (B) Fractional genetic correlations ( $\rho_{Nk}$ ) between the 61 phenotypes (p-value < 0.05) (C) Household correlations (analog of genetic correlation but for household data; see Materials and Methods) between the 61 phenotypes (p-value < 0.05) (D) Fractional household correlations ( $\rho_{Nh}$ ) between the 61 phenotypes (p-value < 0.05).

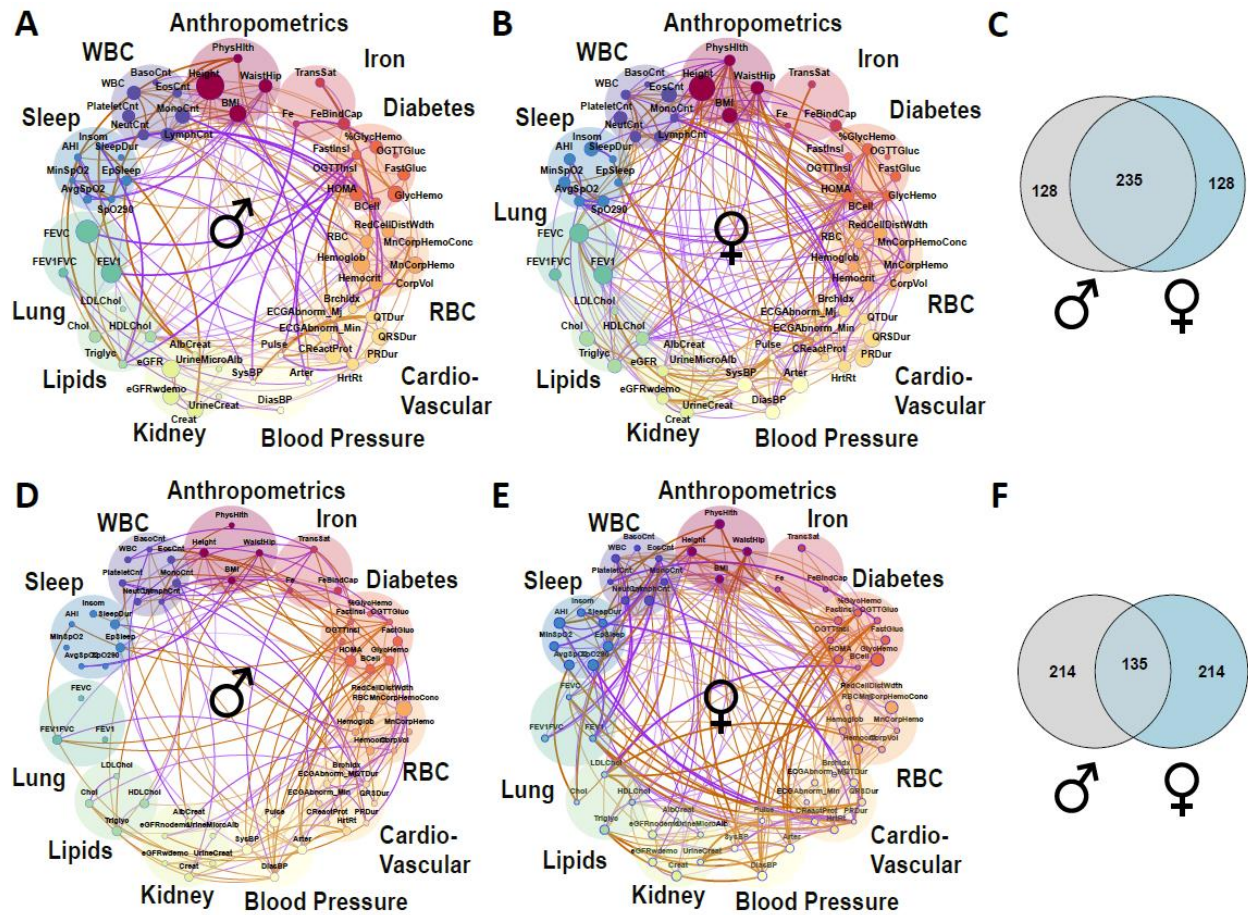

Figure S9 (related to Figure 5). Genetic and environmental correlations and heritabilities differ by gender in Hispanics/Latinos.

(A,B-D,E) Correlation plots where each phenotype is represented by a node and the correlations are represented by connections (edges) between nodes. The size of the node is proportional to the phenotype heritability. The thickness of the edge is proportional to the strength of correlation and the color represents magnitude: orange represents positive and purple negative correlation. Shown are genetic correlations ( $\rho_k$ ) between the 61 phenotypes in the extended HCHS/SOL dataset ( $p$ -value  $< 0.05$ ). Correlations and heritabilities as measured in males (A, D) and females (B, E). The top panels represent genetic correlations (A, B) and the bottom panels (D, E) represent the household correlations. (C, F) Venn diagrams depicting the overlap in significant phenotype-pairs between Males and Females for genetic correlation (C), and household correlation (F).



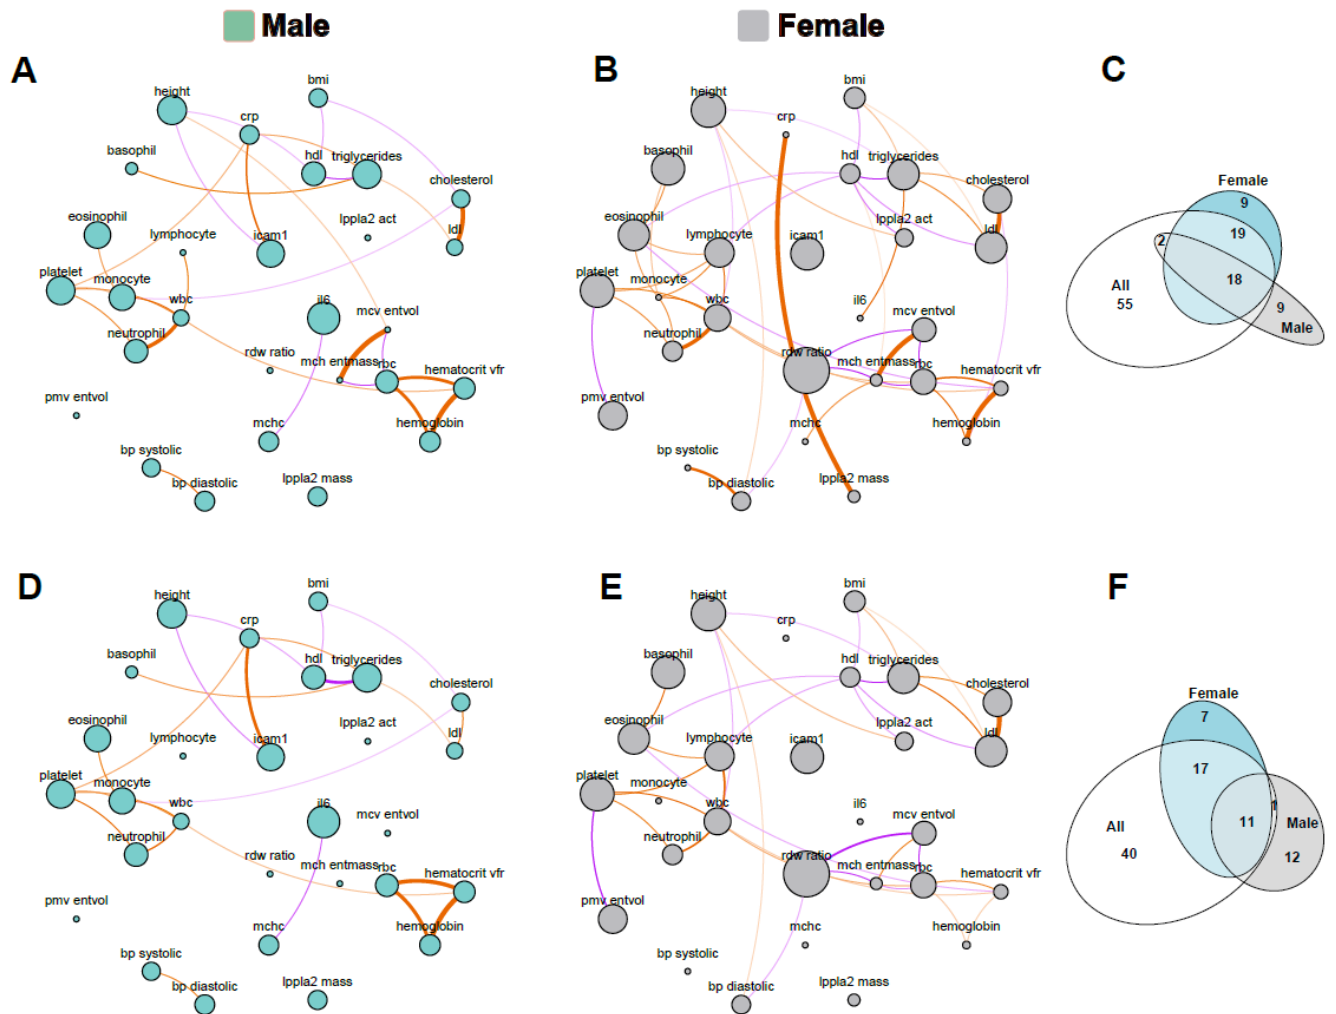

Figure S10 (related to Figure 5). Genetic correlations in individuals of White background stratified by gender.

(A-D) Correlation plots where each phenotype is represented by a node and the correlations are represented by connections (edges) between nodes. The size of the node is proportional to the phenotype heritability. The thickness of the edge is proportional to the strength of correlation and the color represents magnitude: orange represents positive and purple negative correlation. Shown are genetic correlations ( $\rho_k$ ) (A, D) between the 18 phenotypes in the TOPMed dataset ( $p\text{-value} < 0.05$ ;  $|\rho_k| > 0.05$ ); and fractional genetic correlations ( $\rho_{fk}$ ) (A, D) between the 18 phenotypes in the TOPMed dataset ( $p\text{-value} < 0.05$ ;  $|\rho_{fk}| > 0.05$ ). The dataset was stratified by males (A, D) and females (B, E). Venn diagrams depicting the overlap in significant phenotype-pairs (C, F) between males, females and a combined dataset (All) for genetic correlation (C), and fractional household correlation (F).

## References

1. LaVange LM, Kalsbeek WD, Sorlie PD, et al (2010) Sample Design and Cohort Selection in the Hispanic Community Health Study/Study of Latinos. *Ann Epidemiol* 20:642–649
2. Sorlie PD, Avilés-Santa LM, Wassertheil-Smoller S, et al (2010) Design and Implementation of the Hispanic Community Health Study/Study of Latinos. *Ann Epidemiol* 20:629–641
3. Kannel WB, Feinleib M, Mcnamara PM, Garrison RJ, Castelli WP (1979) An investigation of coronary heart disease in families: The framingham offspring study. *Am J Epidemiol* 110:281–290
4. Splansky GL, Corey D, Yang Q, et al (2007) The Third Generation Cohort of the National Heart, Lung, and Blood Institute’s Framingham Heart Study: Design, recruitment, and initial examination. *Am J Epidemiol* 165:1328–1335
5. Dawber TR, Kannel WB, Lyell LP (1963) AN APPROACH TO LONGITUDINAL STUDIES IN A COMMUNITY: THE FRAMINGHAM STUDY. *Ann N Y Acad Sci* 107:539–556
6. Wright JD, Folsom AR, Coresh J, et al (2021) The ARIC (Atherosclerosis Risk In Communities) Study: JACC Focus Seminar 3/8. *J Am Coll Cardiol* 77:2939–2959
7. Bild DE, Bluemke DA, Burke GL, et al (2002) Multi-Ethnic Study of Atherosclerosis: Objectives and design. *Am J Epidemiol* 156:871–881
8. Friedman GD, Cutter GR, Donahue RP, Hughes GH, Hulley SB, Jacobs DR, Liu K, Savage PJ (1988) Cardia: study design, recruitment, and some characteristics of the examined subjects. *J Clin Epidemiol* 41:1105–1116
9. Taylor HA, Wilson JG, Jones DW, Sarpong DF, Srinivasan A, Garrison RJ, Nelson C, Wyatt SB TOWARD RESOLUTION OF CARDIOVASCULAR HEALTH DISPARITIES IN AFRICAN AMERICANS: DESIGN AND METHODS OF THE JACKSON HEART STUDY.
10. Wyatt SB, Diekelmann N, Henderson F, Andrew ME, Billingsley G, Felder SH, Fuqua S, Jackson PB (2003) A community-driven model of research participation: The Jackson Hearth Study participant recruitment and retention study. *Ethn Dis* 13:438–455
11. Redline S, Tishler P V., Tosteson TD, Williamson J, Kump K, Browner I, Ferrette V, Krejci P (1995) The Familial Aggregation of Obstructive Sleep Apnea. *Am J Respir Crit Care Med* 151:682–687
12. Yang J, Lee SH, Goddard ME, Visscher PM (2011) GCTA: A tool for genome-wide complex trait analysis. *Am J Hum Genet* 88:76–82
